# Supplementary material
Source: PubMed Central journal article supplement (PMC4194124)
Supplement: embj0033-1354-sd1.pdf [file embj0033-1354-sd1.pdf]

Supplementary Figure S1

A

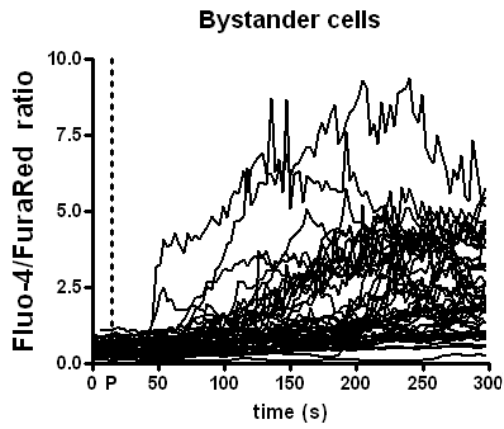

B

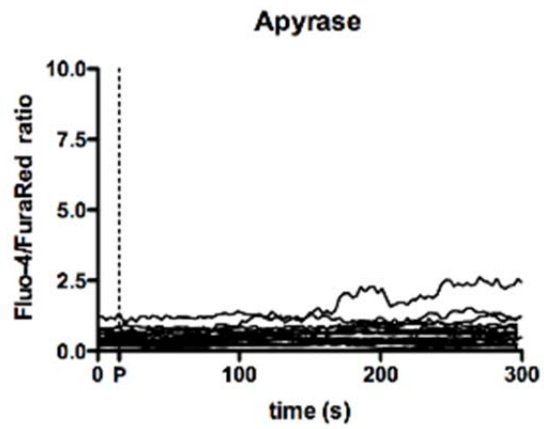

C

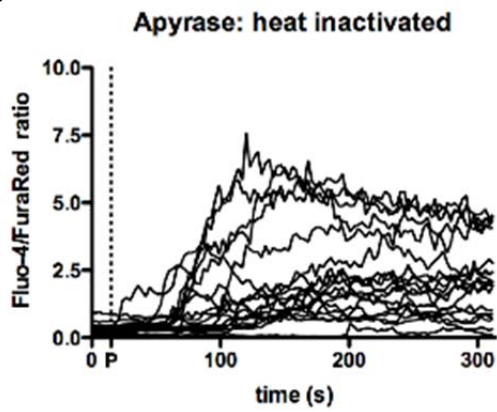

D

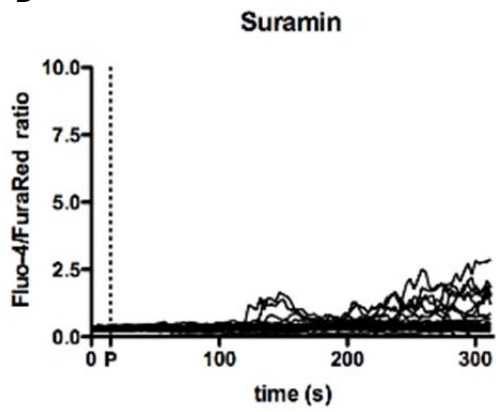

E

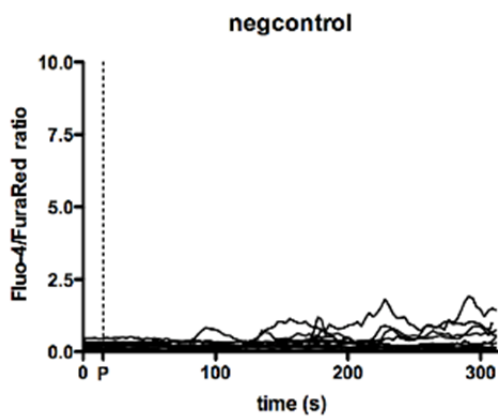

F

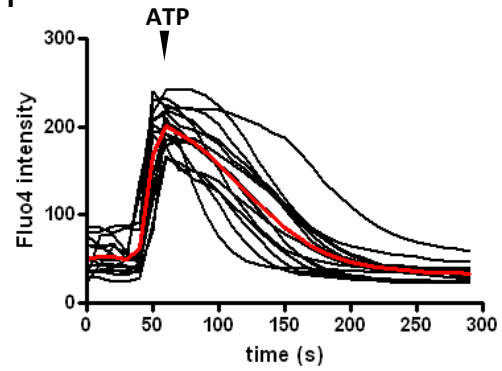

### Supplementary Figure S1

Ratiometric measurement of calcium responses of individual bystander T cells over the course of time-lapse imaging. **A.** Human CD4<sup>+</sup> T cells were loaded with caged-IP<sub>3</sub> and calcium indicators Fluo-4, FuraRed. After the initiation of calcium wave by the flash photolysis of caged-IP<sub>3</sub> in one single T cell at 15s (P, dotted line), increase in cytosolic calcium was clearly observed in non-adhering bystander cells (N = 32 cells). **B-C.** In the presence of apyrase (5 U/ml), but not of heat-inactivated apyrase, the calcium wave was inhibited, and the majority of bystander T cell did not show a positive calcium influx (**B**, N = 21 cells; **C**, N = 20 cells). **D.** Preincubation of the T cells with the P2X receptor antagonist suramin (100 μM) prevented the calcium wave (N = 24 cells). **E.** The negative control represents T cells loaded with calcium indicators only (no caged-IP<sub>3</sub>) and no calcium wave was elicited in bystander T cells (N = 10 cells). **F.** The calcium response of CD4<sup>+</sup> T to extracellular ATP 100 μM. Black lines present the calcium response of single cells and the red line is the mean of 15 cells.
