# Supplementary material
Source: PubMed Central journal article supplement (PMC4194124)
Supplement: embj0033-1354-sd2.pdf [file embj0033-1354-sd2.pdf]

## Supplementary Figure S2

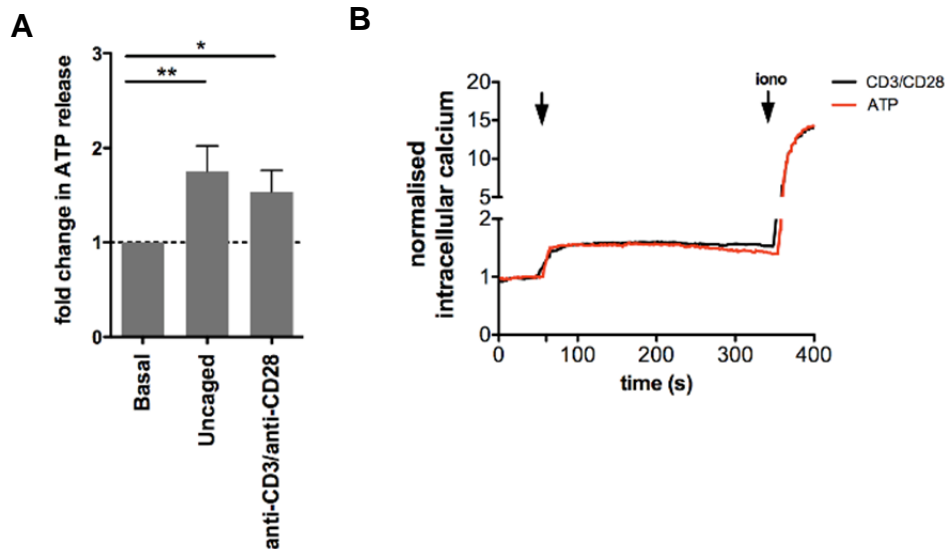

## Supplementary Figure S2

**A.** ATP released by  $10^6$  human peripheral blood  $CD4^+$  T cells after photolysis of caged IP3 or stimulation with anti-CD3 (2  $\mu\text{g/ml}$ ) and anti-CD28 (1  $\mu\text{g/ml}$ ) antibodies. The level of ATP released after 10 minutes of stimulation was measured (\*\* $P < 0.01$ ; \* $P < 0.05$ ) (N = 7 different donors for caged-IP3, N = 4 different donors for anti-CD3/antiCD28).

**B.** Flow cytometry analysis of calcium influx in human  $CD4^+$  T cells in response to anti-CD3/anti-CD28 antibody or extracellular ATP. Basal cytosolic calcium level was acquired for 60s prior to the addition of ATP (100 $\mu\text{M}$ ) or anti-CD3 antibody (5  $\mu\text{g/ml}$ ). The changes in calcium level were recorded for the next 5 minutes and ionomycin was added at the end as positive control (second arrow). The ratiometric calcium levels were normalized using the formula (Fluo4/FuraRed ratio)/(mean of the resting Fluo4/FuraRed in the first 60s) to show the fold of change in relation to basal calcium levels. The magnitude of calcium increase was not significantly different for ATP or anti-CD3 antibody stimuli (N = 3 donors; paired t test).
