# Supplementary material
Source: PubMed Central journal article supplement (PMC4194124)
Supplement: embj0033-1354-sd4.pdf [file embj0033-1354-sd4.pdf]

## Supplementary Figure S4

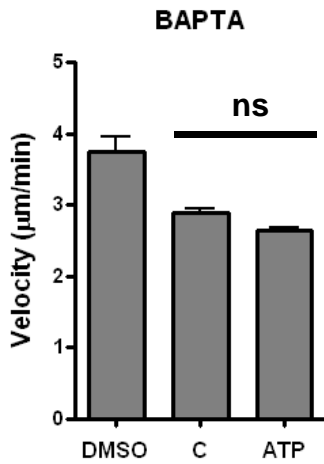

## Supplementary Figure S4

Human  $\text{CD4}^+$  T cells were loaded with the calcium chelator BAPTA ( $10\mu\text{M}$ ) and seeded into a chemotaxis assay chamber. The cells were allowed to settle and migrate towards CXCL12 ( $2.5\text{ nM}$ ) in the presence or absence of extracellular ATP  $100\mu\text{M}$ . Time-lapse images were acquired for 30 minute and the migration speed of the cells was analyzed. ( $P > 0.05$ ,  $N = 3$  donors; control 103 cells, ATP 136 cells). DMSO vehicle was included as an experimental control for the BAPTA ( $N = 48$  cells).
