# Supplementary material
Source: PubMed Central journal article supplement (PMC4194124)
Supplement: embj0033-1354-sd13.pdf [file embj0033-1354-sd13.pdf]

### **Supplementary Video legends**

**Supplementary Video S1** Time-lapse video of intercellular  $\text{Ca}^{2+}$  wave between T cells *in vitro*. Human peripheral  $\text{CD4}^+$  T cells were loaded with Fluo-4 calcium indicator (green) and caged-IP3, where intracellular calcium increase was indicated by the increase in green fluorescent intensity. Calcium wave was initiated by flash photolysis of caged IP3 (ROI, circled) in one T cells that propagates to non-adhering bystander T cells. The video was created using ImageJ with H.253 compression and playback of 7 frames per second. Scale bar 10  $\mu\text{m}$ , time in seconds. This video is directly related to Fig. 1 A.

**Supplementary Video S2** Intercellular  $\text{Ca}^{2+}$  wave was abolished by apyrase (5 U/ml). Human peripheral  $\text{CD4}^+$  T cells were loaded with Fluo-4 calcium indicator (green) and caged-IP3, where an intracellular calcium increase would be indicated with an increase in green fluorescent intensity. Flash photolysis of caged-IP3 (ROI, circled) resulted in intracellular calcium increase in the uncaged T cell but minimal intercellular  $\text{Ca}^{2+}$  wave was observed in bystander T cells. Scale bar 10  $\mu\text{m}$ , time in seconds with video playback of 7 frames per second. This video is directly related to Fig 1. B.

**Supplementary Video S3** Mouse inguinal lymph nodes were cut into 300  $\mu\text{m}$  slices and loaded with calcium indicator Fluo-4 and caged-IP3. Cytosolic calcium is illustrated with the 'rainbow' pseudocolor in the look up tables of ImageJ, where basal calcium level is in blue and the increase is indicated in green and red colors. Calcium wave rapidly formed upon uncaging of IP3 with an UV laser at ROI (circle). Scale bar represents 30  $\mu\text{m}$ , time in seconds. Video was created using ImageJ with H.235 compression and playback of 7 frames per second. This video is directly related to Fig 2 A.

**Supplementary Video S4** Calcium wave in *ex vivo* lymph node slices was abolished in the presence of apyrase. Intracellular calcium increase was observed in the UV laser triggered cell (circle) but no subsequent wave formed in the neighboring cells. Cytosolic calcium is illustrated with the 'rainbow' pseudocolor in look up tables of ImageJ, where basal calcium level is in blue and the increase is indicated in green and red colors. Scale bar represents 30  $\mu\text{m}$ , time in seconds, with video playback 7 frames per second. This video is directly related to Fig 2 C.

**Supplementary Video S5** Resting *ex vivo* lymph node slice was loaded with calcium indicator Fluo-4 and caged-IP3 and imaged over time without the UV laser trigger. Basal calcium dynamics were observed in control *ex vivo* lymph node slices. Cytosolic calcium is illustrated with the 'rainbow' pseudocolor using ImageJ, where basal calcium level is in blue and the increase is indicated in green and red colors. Scale bar represents 30  $\mu\text{m}$ , time in seconds, with video playback 7 frames per second.

**Supplementary Video S6** Migrating T cells in LN slices with OVA-DC. Migration behavior of OT-II (green) and WT (blue) T cells in *ex vivo* lymph node slices containing OVA-DCs (red). Both OT-II T cell and bystander WT T cells migrated minimally in the zone containing OVA-DCs. Some OT-II T cells interact with DCs. Instead, OT-II and WT T cells in the zones without OVA-DC migrate freely and quickly (lower part of video). Migration trajectories of WT T cells are shown. The 3D time-lapse image was acquired using a two-photon microscope every 30 s for 30 min. The images were reconstructed using Imaris software with video playback at 10 frames per second, video time in minutes. This video is related to Fig 6.

**Supplementary Video S7** Migration of OT-II (green) and WT (blue) T cells in *ex vivo* lymph node slices containing OVA-DCs (red) and apyrase (5 U/ml). OT-II T cells migrated minimally, whereas bystander WT T cells maintained their migration velocity when extracellular ATP was degraded by apyrase. Migration trajectories of WT T cells are shown. The 3D time-lapse images were acquired using a two-photon microscope every 30s for 25 min. The images and cell volumes were reconstructed with Imaris software. Video playback 10 frames per second, time in minutes and scale bar represents 15  $\mu\text{m}$ . This video is related to Fig 6.

**Supplementary Video S8** Migration of OT-II (green) and WT (blue) T cells in *ex vivo* lymph node slices containing unpulsed DCs (red). Both OT-II and WT T cells migrated freely in the LN, and did not significantly interact with the dendritic cells. Migration trajectories of WT T cells are shown. The 3D time-lapse images were acquired using a two-photon microscope every 30s for 25 min. The images and cell volumes were reconstructed with Imaris software. Video playback 10 frames per second, time in minutes and scale bar represents 15  $\mu\text{m}$ . This video is related to Fig 6.
