# Supplementary material
Source: PubMed Central journal article supplement (PMC4194124)
Supplement: embj0033-1354-sd14.pdf [file embj0033-1354-sd14.pdf]

Manuscript EMBO-2013-86666

## ATP acts as a paracrine signaling molecule to reduce motility of T cells

Chiuhui Mary Wang, Cristina Ploia, Anselmi Fabio, Adelaida Sarukhan, Antonella Viola

*Corresponding author: Antonella Viola, Istituto Clinico Humanitas IRCCS*

---

### Review timeline:

|                     |                 |
|---------------------|-----------------|
| Submission date:    | 23 August 2013  |
| Editorial Decision: | 15 October 2013 |
| Revision received:  | 12 March 2015   |
| Editorial Decision: | 26 March 2014   |
| Revision received:  | 11 April 2014   |
| Accepted:           | 16 April 2014   |

---

*Editor: Karin Dumstrei*

### Transaction Report:

(Note: With the exception of the correction of typographical or spelling errors that could be a source of ambiguity, letters and reports are not edited. The original formatting of letters and referee reports may not be reflected in this compilation.)

---

Pre-Decision letter

07 October 2013

Thank you for submitting your manuscript to The EMBO Journal. Your study has now been seen by three referees and their comments are provided below.

As you can see below there is an interest in the paper, but the referees also bring up important concerns with the paper, both conceptual and technical. In particular, issues are raised regarding the role of ATP on T cell motility. It is unclear if the raised issues can be addressed and if you can provide more data to support the conclusions, which is what is needed for publication here. Given this, I think it would be most productive if you could provide me with a detailed point-by-point response of what you could potentially add in a revision upfront and I would then use that as a base to make my decision.

You can send me a detailed point-by-point response to this email address.

### REFeree REPORTS:

Referee #1 :

In this submission, the authors confirm prior reports that CD4<sup>+</sup> T lymphocytes can release extracellular ATP upon antigen-dependent activation and intracellular Ca<sup>++</sup> elevation and that these T cells also can respond to such extracellular ATP through P2X receptors by altering their calcium levels. They characterize the specific members of the P2X family (P2X4 and P2X7) that have the major role in such responses and provide limited in vitro data that such trans-signaling affects chemotactic behavior of the affected cells. They then suggest that similar trans-signaling in vivo can facilitate effective T cell-APC interactions by modulating the migratory behavior of antigen-unengaged T cells and provide data in lymph node slice cultures imaged using 2P methods that

Ca<sup>++</sup>-dependent ATP release changes the velocity of antigen-unspecific T cells in such a tissue setting. They conclude that 'calcium waves' induced by ATP release and regional signaling in lymphoid tissues contributes to effective immune responses by promoting more effective T-APC interactions.

As the authors nicely document through their citations, the concept that T cells secrete ATP through pannexin channels upon antigen receptor triggering and Ca<sup>++</sup> flux changes is well established in the literature, even if most immunologists do not take such evidence into account in their models of immune cell function. Thus, much of the data in this paper is confirmatory and especially the in vitro work with human cells showing that caged IP3 release of intracellular Ca<sup>++</sup> can induce Ca<sup>++</sup> changes in nearby cells in an apyrase-sensitive manner does little to expand on these known features of T cell biology.

The main thrust of the present paper is the linking of these biochemical changes to alterations in T cell motility in vitro and in tissue slices. Using a standard chemotaxis chamber, the authors report a reduced T cell motility in response to CXCR4 in the presence of ATP and extracellular Ca<sup>++</sup>. In tissue slices, they provide data in Fig. 6 indicating that polyclonal T cells show reduced motility in the presence of OTII TCR Tg T cells when these latter cells are engaged in specific interactions with antigen-bearing DC. They further report that this loss of velocity is not seen upon apyrase treatment of the tissue, whereas the ag-engaged OTII cells remain arrested even with apyrase present. They conclude from these data that in vivo, Ca<sup>++</sup> signaling in trans due to Ca<sup>++</sup> dependent ATP release from antigen activated T cells modifies the behavior of other antigen-unengaged T cells in manner that would promote effective scanning for and response to antigen.

Given that all but the motility aspects of the paper are more or less confirmations of previous reports on ATP and Ca<sup>++</sup> in T cells, these latter experiments are the heart of the paper and unfortunately, suffers from a number of problems.

1. At the very end of the Results section, the authors state: "Thus, we speculated that ATP-dependent calcium waves may reduce bystander cell motility to create a zone of lymphocyte swarming and clustering as observed in antigen challenged lymph nodes (Miller et al, 2002) and to favor T cell scanning of antigen-loaded dendritic cells." Quite the opposite would be true. Ca<sup>++</sup> inhibits motility and this would prevent effective scanning by the T cells - swarming does not result from reduced motility per se but from a failure to undergo migration to a distance from the cell at the center of the swarm, usually due to either physical contacts below light microscopic resolution or to chemokine effects. Cells with markedly reduced migration would fail to scan effectively for antigen bearing cells because they would show reduced overall trafficking through the LN. Furthermore, the slowing of unpecific cells near to an APC would limit trafficking of specific cells coming from a distance due to interference with pathways for migration such as the FRC network on which T cells move. This would also limit, not enhance, effective T cell activation of rare cells in the repertoire. Indeed the Miller work cited here stresses the need for very fast movement of T cells into and away from contact with dendrites of APC to achieve effective repertoire scanning. Thus, aside from whether the data themselves show the claimed effect, the conclusion that this effect would augment responses is not consistent with current understanding of how T cells find antigen sources in lymphoid tissue.

2. With respect to the key 2P data in Figure 6 that is used to support the claim that ATP induced Ca<sup>++</sup> changes in antigen-engaged cells controls motility, OTII and polyclonal T cells normally migrate at the same velocity in the absence of specific antigen, so the differences shown here are unexplained and very unexpected. How do the authors explain these findings? Further, if there were the autocrine effect of ATP on Ca<sup>++</sup> reported in the paper, one would have expected some difference in motility with added apyrase even with the OTII cells. Finally, the velocity of the WT cells in the presence of activated OTII is at the level most investigators consider non-motile (2 um/minute) so this would imply that the cells do not move. This can hardly help in them finding the right APC and is also a surprising finding even given the idea that released ATP can impact motility.

3. Aside from the previous concerns, the authors fail to take note of existing data in the literature that are clearly in conflict with their results. Bystander migration experiments have been previously reported using true intravital 2P imaging by several groups, especially Egen et al. (Immunity. 2011 May 27;34(5):807-19). In this cited study, as one example, it is quite clear that there is little or no

effect of activation of all the antigen-specific T cells in a mycobacterial granuloma with specific peptide antigen on the velocity/migration of antigen unspecific cells in the immediate environment. These studies were carried out in a reciprocal fashion, ensuring that lack of a trans-effect was not due to the specific TCR Tg cells used, and the experiments include the same OTII TCR tg line employed here. So the new data reported here in conflict with already published studies done under more physiologic conditions. These results showing a lack of trans-repression of migration are not specific to the inflammatory environment of the infected liver, because several groups have used the cotransfer of labeled specific and unspecific T cells to show that only antigen-specific T cells show stopping behavior around antigen-bearing DC and that the unspecific lymphocytes in the vicinity have the same motility as unspecific cells in a LN lacking substantial numbers of agonist mediated T cell activation events.

The authors need to explain how such differences could be obtained with respect to other studies vs. theirs to make a strong argument for the relevance of slice data. One worries about the impact in the slice prep of large amounts of DAMPS from damaged cells at the cut surfaces that could impact T cell behavior.

4. A number of important controls appear absent throughout. Perhaps I missed it, but I do not see any vehicle controls for the apyrase treatments, so the specificity of the effect of this crucial reagent remains unclear. Aside from then vehicle issue, the absence of any excipients (such as PAMPS commonly seen in laboratory grade reagents) in such material is unclear. Their presence could have critical effects through induction of chemokine release or other activities. Heat-inactivation of the enzyme would be a first step to examining these issues.

5. In Fig. 5, the direction of the gradient is not shown, the number of experiments or cells examined is not reported, and the KD or drug treatments used to show a role for P2X receptors should have been included.

6. In Figure 1, panels E and F, are the traces for a single cell that is 'representative' or are these averages over the indicated number of tested cells? Why do the cells in which IP3 is uncaged show a single peak of Ca<sup>++</sup> response, but the putative targets of the released ATP show oscillations? What is the cut-off in the Ca<sup>++</sup> dye ratio for concluding that a cell responded? Is the ATP release oscillatory even though the Ca<sup>++</sup> change is not in the lasered cells?

7. In Figure 2A, the lasered cell does not show an obvious Ca<sup>++</sup> elevation at 10 seconds before adjacent cells do, raising questions about the experimental set-up. At 20 seconds, there are several Ca<sup>++</sup> positive cells far from the index cell but many intervening cells remain negative. Why is this if one is looking at a small diffusible molecule spreading from a point source? In Panel c, several cells at a distance from the index cell show Ca<sup>++</sup> elevation in this frame but no intervening cells are positive - what does this indicate?

Referee #2:

In their manuscript the authors explore the importance of extracellular ATP in paracrine signaling between T cells. While there is some data on the pivotal role of ATP in controlling T cell activation through autocrine manner, the importance of extracellular ATP for T cell-to-T cell communication and the physiological importance of this paracrine signaling are less well known.

The authors perform dynamic imaging experiments on T cells loaded with caged-IP3 that permit, through laser control, to trigger an increase in Ca in one cell and look at the influence on surrounding lymphocytes. From these experiments and others, using an ATP hydrolase, the authors draw the conclusion that extracellular ATP, released by activated T cell, exerts an effect on neighboring lymphocytes by increasing their intracellular Ca. A strength of the work is that experiments are not only performed with cultured cells but with a more physiological system of lymph node slices. Additionally, data obtained in vitro and in lymph node slices are provided to suggest that Ca increase, triggered by ATP, alters the migration of T cells. The physiological importance of this reduced T cell motility is discussed.

The notion that extracellular ATP can have paracrine functions on T cells has been suggested previously by in vitro experiments, but this manuscript potentially provides support for this idea

using near in vivo conditions. This is considered of potential significance but preliminary at this stage and several major concerns must be addressed.

Specific major concerns:

1. The use of apyrase

This study relies entirely on the use of apyrase to demonstrate the involvement of ATP in regulating communication between T cells. Key experiments should be repeated with another inhibitor of ATP signaling such as oxidized ATP.

Regarding the use of apyrase, a control using a solution with the same concentration of protein (fatty acid-free BSA) is needed as known paracrine factors like reactive-oxygen species are buffered by proteins.

2. Effect of ATP on T cell motility:

The authors conclude from Figures 6 and 7 that a release of ATP from activated T cells triggers an increase in Ca in the neighboring cells which is responsible for reducing T cell motility. However, this conclusion is not supported by the data and additional control experiments are needed to assess this finding.

Indeed, a close examination of Figure 6A and B shows that the motility of control WT T cells within lymph node slices, in the absence of antigen, is unusually low (3-4  $\mu\text{m}/\text{min}$  in average compared to 10-15  $\mu\text{m}/\text{min}$  in the majority of studies even the one performed with LN slices). This near static displacement is comparable to that of OT2 T cells interacting with ova-pulsed dendritic cells. This is a concern as it is unknown whether the same paracrine effect would be still observed when T cells move with a normal speed. One possible reason for such a low motility is that the recording has been made near the cut surface of the slice, in regions in which T cells hardly migrate. The authors must repeat these experiments and make sure images are captured 20-30  $\mu\text{m}$  below the surface of the slice.

To demonstrate a role of Ca in ATP-induced T cell stopping, the authors performed in vitro experiments in which T cell are bathed in a Ca-free solution and stimulated or not with ATP. Fig 5E shows that in the absence of Ca, ATP does not affect T cell motility. However, the absence of external Ca, by itself, has a major impact (a 3 fold reduction) on T cell migration triggered by SDF1. In these conditions, the authors cannot conclude that ATP mediates its effect through Ca elevation. Experiments should be repeated using BAPTA, an intracellular Ca chelator.

Other concerns that should be addressed:

Caged compounds offer a number of advantages. Yet, several sources of errors has also been described with these reagents including an effect of the flash itself as well as the release of a number of biologically active molecules upon the photolysis of caged compounds. Thus, a control experiment is required to make sure that the flash does not trigger a response in the absence of caged IP3.

Fig 1F shows a flat Ca curve for bystander T cells treated with apyrase. This is not consistent with Fig 1C and image B that show rare T cells increasing their Ca upon apyrase treatment. Does the Fig 1F display the Ca concentration of a single cell or does it represent the mean of multiple cells? In such a case, how many cells have been analyzed?

Fig 2: In lymph node slices, the Ca wave spreads extremely rapidly within the first 20 seconds following the uncaging of IP3 in the first cells. By comparison, the spreading effect is much slower on cultured cells. The authors should comment on the possible reasons of such a difference.

Fig 3 C and D and 4B: The authors state on many occasions that T cells, either bystander or stimulated with ATP, exhibit Ca oscillations. However, only average Ca responses are shown. Are the ATP-induced Ca responses indeed oscillating? The authors should show traces corresponding to typical single cell Ca responses, elicited in bystander cells after single cell stimulations, or after bath-applied ATP. In addition, the ordinate in Fig 4B is not correct. Indeed, Flow cytometry does not permit to measure Ca oscillations. Instead of "% of cells oscillated", one should read "% of ATP-responding T cells"

The videos 6 and 7 show the dynamic behavior of only one or two T cells surrounding a T-DC

conjugate. With this low number of T cells, you cannot really judge on the motility of T cells close to or more distant from a T-DC conjugate. Can the authors provide some movies showing the raw data (max projection or best focus and not 3D reconstructions) of T-DC conjugates surrounded by multiple T cells.

The present study suffers from lack of details and information.

- Fig 1C: what are the criteria to determine if a T cell has increased its Ca or not?
- Figure 5 B-E: values should be given in  $\mu\text{m}$  and not in pixels.
- In Fig 3 and 5, experiments are performed in the absence of Ca. What does "absence of Ca" mean? Ca buffered with a chelator (which final Ca concentration?) or no Ca added (which means a few tens of  $\mu\text{M}$  in reality)?

Referee #3 :

In this manuscript, Drs. Wang et al described that ATP release serves as a novel cell-to-cell communication mechanism. Specifically, they reported that ATP released by stimulated T cells induces P2X4/P2X7-mediated calcium waves in the neighboring lymphocytes. Using lymph node slices, they found evidence that ATP acts as a paracrine messenger that reduces the motility of lymphocytes during T cell priming. They conclude that this mechanism may be necessary for antigen scanning by T cells.

Comments:

The title could be more precise.

The finding that ATP causes calcium waves in T cell preparations is not entirely new and was reported about a decade ago by Cahalan's group. This work should be cited.

Induction of  $\text{Ca}^{2+}$  signaling by using caged IP3 does not necessarily replicate the complex processes induced via TCR/CD28 stimulation. Please comment on rationale and compare ATP release using this and other T cell stimulation methods, e.g., with microbeads carrying CD3/Cd28 ABs.

The amount of ATP released by a single cell might not be high enough to trigger P2X receptors in bystander cells (especially after diffusion of the released ATP). It would be necessary to demonstrate that exogenous ATP induces similar responses as those shown in Fig. 1.

The amount of ATP released should be quantified.

Figure 1: negative controls should be added and evidence or absence of spontaneous  $\text{Ca}^{2+}$  fluxing should be shown. Please also state how many cells per image frame were assessed (n seems quite low).

The difference between control and apyrase treatment does not seem very impressive when one compares the data shown in Fig. 1A and 1B.

Figure 2: It would be interesting to know what could cause the termination of the  $\text{Ca}^{2+}$  waves. This is an important question since bystander cells may also release ATP.

Fig. 3: Did you perform the experiment in the absence of caged drugs? Could it be that UV excitation induces ATP?

Figure 4: Panel A - why are data for other P2XRs not shown? In panels B & D, please indicate how many cells were analyzed? In panel E, it would be interesting to see the calcium response to TCR/CD28 stimulation for comparison reasons.

Data in Figure 4, panel G should also be shown using imaging as was so nicely done in Fig. 1. Was it possible to detect ATP-induced  $\text{Ca}^{2+}$  influx also via microscopy and at what concentrations? `

In Figure 5, could a similar experiment be done with Fluo-4 loaded cells to image possible Ca<sup>2+</sup> waves in migrating cells? Which effect did apyrase or P2X4 and P2X7 antagonists have on migration? Please could you show velocity results in um/min rather than pixels/min?

Figure 6: How could one explain that WT but not OT-II T cells were affected by apyrase?

1st Editorial Decision

15 October 2013

---

Thanks for submitting your point-by-point response. I have now had a chance to take a careful look at the proposed experiments.

I appreciate your response and agree with you that quantifying ATP release and to repeat the data in intact lymph nodes with different dyes and inhibitor are key experiments that should be performed. For the rest of the queries, I see that you have either data on hand or reasonable responses to the raised concerns. Given your outline, I would therefore like to invite you to submit a suitably revised manuscript that addresses the concerns raised as discussed.

When preparing your letter of response to the referees' comments, please bear in mind that this will form part of the Review Process File, and will therefore be available online to the community. For more details on our Transparent Editorial Process, please visit our website: <http://www.nature.com/emboj/about/process.html>

We generally allow three months as standard revision time. As a matter of policy, competing manuscripts published during this period will not negatively impact on our assessment of the conceptual advance presented by your study. However, we request that you contact the editor as soon as possible upon publication of any related work, to discuss how to proceed. Should you foresee a problem in meeting this three-month deadline, please let us know in advance and we may be able to grant an extension.

Thank you for the opportunity to consider your work for publication. I look forward to your revision.

*(Referee reports already provided before)*

1st Revision - authors' response

12 March 2015

---

(see next page)

## Referee #1

We thank the referee for his/her comments and suggestions. We have tried to address all of them and modify the manuscript accordingly.

*In this submission, the authors confirm prior reports that CD4+ T lymphocytes can release extracellular ATP upon antigen-dependent activation and intracellular Ca<sup>++</sup> elevation and that these T cells also can respond to such extracellular ATP through P2X receptors by altering their calcium levels. They characterize the specific members of the P2X family (P2X4 and P2X7) that have the major role in such responses and provide limited in vitro data that such trans-signaling affects chemotactic behavior of the affected cells. They then suggest that similar trans- signaling in vivo can facilitate effective T cell- APC interactions by modulating the migratory behavior of antigen-unengaged T cells and provide data in lymph node slice cultures imaged using 2P methods that Ca<sup>++</sup>-dependent ATP release changes*

*the velocity of antigen-unspecific T cells in such a tissue setting. They conclude that 'calcium waves' induced by ATP release and regional signaling in lymphoid tissues contributes to effective immune responses by promoting more effective T-APC interactions.*

*As the authors nicely document through their citations, the concept that T cells secrete ATP through pannexin channels upon antigen receptor triggering and Ca<sup>++</sup> flux changes is well established in the literature, even if most immunologists do not take such evidence into account in their models of immune cell function. Thus, much of the data in this paper is confirmatory and especially the in vitro work with human cells showing that caged IP3 release of intracellular Ca<sup>++</sup> can induce Ca<sup>++</sup> changes in nearby cells in an apyrase-sensitive manner does little to expand on these known features of T cell biology.*

As noted by referees 2 and 3, although the autocrine effects of ATP are well known, ATP paracrine effects in lymphocytes are not documented. Moreover, the existence of ATP-induced calcium waves in T cells and in LNs is totally new.

*The main thrust of the present paper is the linking of these biochemical changes to alterations in T cell motility in vitro and in tissue slices. Using a standard chemotaxis chamber, the authors report a reduced T cell motility in response to CXCR4 in the presence of ATP and extracellular Ca<sup>++</sup>. In tissue slices, they provide data in Fig. 6 indicating that polyclonal T cells show reduced motility in the presence of OTII TCR Tg T cells when these latter cells are engaged in specific interactions with antigen-bearing DC. They further report that this loss of velocity is not seen upon apyrase treatment of the tissue, whereas the ag-engaged OTII cells remain arrested even with apyrase present. They conclude from these data that in vivo, Ca<sup>++</sup> signaling in trans due to Ca<sup>++</sup> dependent ATP release from antigen activated T cells modifies the behavior of other antigen-unengaged T cells in manner that would promote effective scanning for and response to antigen.*

The first approach we used was to provide an entire set of *in vitro* data demonstrating that ATP induces reduction of motility (all parameters) and that this depends on calcium (Fig. 5). The data

obtained in LN slices using 2P microscopy were added to provide further biological significance, but we had already demonstrated the mechanism in Fig 5.

1. At the very end of the Results section, the authors state: "Thus, we speculated that ATP-dependent calcium waves may reduce bystander cell motility to create a zone of lymphocyte swarming and clustering as observed in antigen challenged lymph nodes (Miller et al, 2002) and to favor T cell scanning of antigen-loaded dendritic cells." Quite the opposite would be true.  $Ca^{++}$  inhibits motility and this would prevent effective scanning by the T cells - swarming does not result from reduced motility per se but from a failure to undergo migration to a distance from the cell at the center of the swarm, usually due to either physical contacts below light microscopic resolution or to chemokine effects. Cells with markedly reduced migration would fail to scan effectively for antigen bearing cells because they would show reduced overall trafficking through the LN. Furthermore, the slowing of unspecific cells near to an APC would limit trafficking of specific cells coming from a distance due to interference with pathways for migration such as the FRC network on which T cells move. This would also limit, not enhance, effective T cell activation of rare cells in the repertoire. Indeed the Miller work cited here stresses the need for very fast movement of T cells into and away from contact with dendrites of APC to achieve effective repertoire scanning. Thus, aside from whether the data themselves show the claimed effect, the conclusion that this effect would augment responses is not consistent with current understanding of how T cells find antigen sources in lymphoid tissue.

We apologize for lack of clarity. We meant that ATP functions as an "alarm signal" that reduces (but does not stop) the velocity and thus allows cells to stay where the antigen is and to look for DCs. Indeed, we have recently demonstrated the existence of a delicate equilibrium between adhesive and chemoattractant forces operating in lymph nodes during T cell priming, allowing enough motility for T cell repertoire scanning whilst ensuring the formation of long-lasting conjugates, once a cognate T-APC pair is formed. Variations in this equilibrium, such as those due to the hyperfunctional mutant CXCR4 of WHIM patients – people having an hyperfunctional chemokine receptor leading to defective innate and adaptive immune responses - leads to impaired stability of the immunological synapse and consequently contribute to an aberrant adaptive immune response (Kallikourdis M, Trovato AE, Anselmi F, Sarukhan A, Roselli G, Tassone L, Badolato R, Viola A. The CXCR4 mutations in WHIM syndrome impair the stability of the T cell immunological synapse. *Blood* 2013; 122(5):666-73). In fact, although WHIM cells move faster than control cells, they do not form conjugates with antigen- presenting DCs. This can be explained by a competition between stop and go signals during the formation of the immunological synapse in LNs (Bromley SK, Peterson DA, Gunn MD, Dustin ML. Cutting edge: hierarchy of chemokine receptor and TCR signals regulating T cell migration and proliferation. *J Immunol.* 2000;165 (1):15-19; Dustin ML. Stop and go traffic to tune T cell responses. *Immunity.* 2004;21 (3):305-314.; Viola A, Contento RL, Molon B. T cells and their partners: The chemokine dating agency. *Trends Immunol.* 2006;27 (9):421-427).

In support of our interpretation of the velocity experiments with WT cells, a recent paper has described the behaviour of polyclonal T cells in an infected lymph node and found that T cells reduce their motility to better scan the tissue ("*Upon infection with T3SS- S. flexneri, T cells*



*migrated at lower speeds... The arrest coefficient was increased by approximately 1.5 fold ( $35 \pm 2\%$ ). This resulted from a decrease in the percentage of cells exhibiting arrest coefficients....Confinement index was increased, indicating that T-cell migration area was more restricted. These T-cell dynamics are consistent with the behavior of polyclonal CD4+ T cells scanning the site of infection for possible recognition of cognate antigen" Proc Natl Acad Sci U S A. 2013; 110(12): 4458–4463). In the same PNAS issue, another paper has analysed measure speed of OT-II cells and WT cells in LN immunized with OVA-Alum without (ctrl) or with DNase (PNAS 2013 110(12) E1122). The paper reports the following: "As a second means of analyzing the ability of the T cells to move away from their origin over time, we analyzed the mean squared displacement (MSD) over time. In the control mice, we observed a significant drop in the MSD of the OTII cells over a 10-min track duration compared with the polyclonal CD4 T cells, indicating that in control mice, the OTII T cells are staying closer to their origin (Fig. 4B). On the other hand, in DNase-treated mice, there was no difference in the MSD over a 10-min track duration between OTII cells and polyclonal CD4 T cells. In some fields, there was also an increase in velocity and displacement of the B6 cells in DNase-treated mice vs. controls (Fig. 4 A and B and Movies S1 and S2). **It is not clear why this occurred, but it suggests that perhaps in regions of LN where there are prolonged interactions between OTII cells and APCs, changes occur in the DCs that result in increased interaction time with T cells in general.**"*

These two studies, in addition to those cited above, indicate that a reduced velocity of un-triggered (unspecific) T cells may favour LN scanning and is indeed observed in reactive LNs, but they do not provide any possible explanation of the mechanism responsible for this effect. We agree that the discussion was not clear enough and we have now improved it to better explain these concepts.

**2. With respect to the key 2P data in Figure 6 that is used to support the claim that ATP induced  $Ca^{++}$  changes in antigen-engaged cells controls motility, OTII and polyclonal T cells normally migrate at the same velocity in the absence of specific antigen, so the differences shown here are unexplained and very unexpected. How do the authors explain these findings? Further, if there were the autocrine effect of ATP on  $Ca^{++}$  reported in the paper, one would have expected some difference in motility with added apyrase even with the OTII cells. Finally, the velocity of the WT cells in the presence of activated OTII is at the level most investigators consider non-motile ( $2 \mu\text{m}/\text{minute}$ ) so this would imply that the cells do not move. This can hardly help in them finding the right APC and is also a surprising finding even given the idea that released ATP can impact motility.**

Different cells may exhibit different migration speeds. For example, in the PNAS paper cited above (2013; 110(12): 4458–4463), OT-II cells migrated at mean velocity of  $5.4 \pm 0.27 \mu\text{m}/\text{min}$  whereas polyclonal cells had a mean velocity of  $8.9 \pm 0.15 \mu\text{m}/\text{min}$ . We also observed different velocities, although in our case WT cells were slower than OT-II cells. This may depend on the dyes used as well on the different system (intravital vs LN slices) or the different cell preparation, but the fact that two cell populations display different mean velocities in the same LN is not surprising and already documented. We have also performed the same experiment using two different TCR transgenic T cells, specific for different antigens (Hemagglutinin (HA-

TCR) and Leishmania major LACK antigen (LACK-TCR)) and found the same results. In this case, they had very similar velocities (TCR-HA  $7.27 \pm 0.55 \mu\text{m}/\text{min}$ , TCR-LACK  $8.42 \pm 0.53 \mu\text{m}/\text{min}$ ) in the absence of peptides. In the presence of LACK-DCs, the velocity of HA-TCR T cells was  $4.56 \pm 0.26 \mu\text{m}/\text{min}$ .

As for the last question, in these experiments, OT-II cells slow down their velocity because they engage interactions with OVA-pulsed DCs. During these interactions, they get triggered and secrete ATP, which slows down WT T cells. When apyrase is added, OT-II cells are still in contact with OVA-DCs (there is no reason why apyrase should break T-DCs conjugates) and thus they move little, whereas WT T cells recover their motility.

We repeated the 2P imaging experiment and made sure all the z-stacks were acquired at least 20 $\mu\text{m}$  under the surface of the LN slice. We improved the overall protocol starting with cell labeling, increasing the overlay time to increase cell penetrance into the slices, and interchanging the dyes between WT and OT2 T cells. Some discrepancies did remain between the two T cell populations but the overall velocities have improved in the new experiments (new Figure 6).

**3.** *Aside from the previous concerns, the authors fail to take note of existing data in the literature that are clearly in conflict with their results. Bystander migration experiments have been previously reported using true intravital 2P imaging by several groups, especially Egen et al. (Immunity. 2011 May 27;34(5):807-19). In this cited study, as one example, it is quite clear that there is little or no effect of activation of all the antigen-specific T cells in a mycobacterial granuloma with specific peptide antigen on the velocity/migration of antigen unspecific cells in the immediate environment. These studies were carried out in a reciprocal fashion, ensuring that lack of a trans-effect was not due to the specific TCR Tg cells used, and the experiments include the same OTII TCR tg line employed here. So the new data reported here in conflict with already published studies done under more physiologic conditions. These results showing a lack of trans-repression of migration are not specific to the inflammatory environment of the infected liver, because several groups have used the cotransfer of labeled specific and unspecific T cells to show that only antigen-specific T cells show stopping behavior around antigen-bearing DC and that the unspecific lymphocytes in the vicinity have the same motility as unspecific cells in a LN lacking substantial numbers of agonist mediated T cell activation events. The authors need to explain how such differences could be obtained with respect to other studies vs. theirs to make a strong argument for the relevance of slice data. One worries about the impact in the slice prep of large amounts of DAMPS from damaged cells at the cut surfaces that could impact T cell behavior.*

The mentioned study by Egen et al. used activated T cells and analysed motility in the liver, whereas we have analysed naïve T cells in LNs. Interestingly, Salgado-Pabon et al (PNAS 2013), analysing naïve T cells in LNs, found that *S. flexneri* impairs the migration pattern of CD4<sup>+</sup> T cells independently of cognate recognition of bacterial antigens. In this study, in agreement with our data, the infection inhibited the migration velocities of both antigen-specific and unspecific T cells. Similar results were obtained by the group of P. Marrack (PNAS 2013), as already

discussed in our answer to point 1.

The reason why Egen et al. did not observe the same results may depend on the use of activated cells or by the liver microenvironment. We have observed that P2X receptor expression is modulated during the T cell life and a different pattern of P2X receptors may result in different responses to ATP.

We are not aware of other 2P studies in liver in which polyclonal and antigen-specific T cells were analysed. We have discussed this issue with two major experts in the field (Matteo Iannacone and Luca Guidotti) who confirmed that at their knowledge these experiments have not been performed.

**4.** *A number of important controls appear absent throughout. Perhaps I missed it, but I do not see any vehicle controls for the apyrase treatments, so the specificity of the effect of this crucial reagent remains unclear. Aside from then vehicle issue, the absence of any excipients (such as PAMPS commonly seen in laboratory grade reagents) in such material is unclear. Their presence could have critical effects through induction of chemokine release or other activities. Heat-inactivation of the enzyme would be a first step to examining these issues.*

We thank the referee for this comment. Yes, we had done the control experiments with both PBS vehicle alone (not shown) and heat-inactivated apyrase (included in the new figure 1). A complete set of controls is also shown in the Supplementary Figure 1.

**5.** *In Fig. 5, the direction of the gradient is not shown, the number of experiments or cells examined is not reported, and the KD or drug treatments used to show a role for P2X receptors should have been included.*

We have improved Figure 5, added the direction of the gradient, the number of experiments and cells analyzed in the figure legend. We also performed additional control experiments using the P2X inhibitor suramin, and the calcium chelator BAPTA (Supplementary figure 4).

**6.** *In Figure 1, panels E and F, are the traces for a single cell that is 'representative' or are these averages over the indicated number of tested cells? Why do the cells in which IP3 is uncaged show a single peak of Ca<sup>++</sup> response, but the putative targets of the released ATP show oscillations? What is the cut-off in the Ca<sup>++</sup> dye ratio for concluding that a cell responded? Is the ATP release oscillatory even though the Ca<sup>++</sup> change is not in the lased cells?*

The majority of the bystander cells only oscillated once within the imaging time frame (one peak). Fig1F shows the mean of 20+ cells. The cells that were nearest to the uncaged cell began to oscillate first, for which the mean demonstrated a small increase in calcium ratio. As the time went on, more cells began to oscillate, which further increased the ratio, thus creating the effect of increasing lines of the graph. Graphs showing original calcium oscillation are now included (Supplementary Figure 1).

The cut off line was the increase of calcium ratio more than 1.5 (basal calcium level is 1). If calcium changes are not oscillatory, we did not expect the ATP release to be oscillatory as well.

7. In Figure 2A, the lased cell does not show an obvious  $Ca^{++}$  elevation at 10 seconds before adjacent cells do, raising questions about the experimental set-up. At 20 seconds, there are several  $Ca^{++}$  positive cells far from the index cell but many intervening cells remain negative. Why is this if one is looking at a small diffusible molecule spreading from a point source? In Panel c, several cells at a distance from the index cell show  $Ca^{++}$  elevation in this frame but no intervening cells are positive - what does this indicate?

In order to penetrate the LN slice and uncage the IP3, a stronger laser power was used and this has bleached the fluo-4 signal of the lased cell (effect of FRAP). Looking carefully at the control video of LN basal calcium oscillation, it is clear that the cells distant from the 'wave' were part of the basal oscillation, which is not triggered by the use of laser. In panel C we showed that apyrase prevented the formation of calcium wave but did not stop basal oscillation.

## Referee #2

We thank the referee for his/her comments and suggestions. We have tried to address all of them and modify the manuscript accordingly.

*In their manuscript the authors explore the importance of extracellular ATP in paracrine signaling between T cells. While there is some data on the pivotal role of ATP in controlling T cell activation through autocrine manner, the importance of extracellular ATP for T cell-to-T cell communication and the physiological importance of this paracrine signaling are less well known. The authors perform dynamic imaging experiments on T cells loaded with caged-IP3 that permit, through laser control, to trigger an increase in Ca in one cell and look at the influence on surrounding lymphocytes. From these experiments and others, using an ATP hydrolase, the authors draw the conclusion that extracellular ATP, released by activated T cell, exerts an effect on neighboring lymphocytes by increasing their intracellular Ca. A strength of the work is that experiments are not only performed with cultured cells but with a more physiological system of lymph node slices. Additionally, data obtained in vitro and in lymph node slices are provided to suggest that Ca increase, triggered by ATP, alters the migration of T cells. The physiological importance of this reduced T cell motility is discussed.*

*The notion that extracellular ATP can have paracrine functions on T cells has been suggested previously by in vitro experiments, but this manuscript potentially provides support for this idea using near in vivo conditions. This is considered of potential significance but preliminary at this stage and several major concerns must be addressed.*

*Specific major concerns:*

**1. The use of apyrase** *This study relies entirely on the use of apyrase to demonstrate the involvement of ATP in regulating communication between T cells. Key experiments should be repeated with another inhibitor of ATP signaling such as oxidized ATP. Regarding the use of apyrase, a control using a solution with the same concentration of protein (fatty acid-free BSA) is needed as known paracrine factors like reactive- oxygen species are buffered by proteins.*

*Oxidized ATP is not a suitable antagonist for our experiments as the literature suggests it is predominantly a P2X7 inhibitor. We opted for suramin, which is a general P2X antagonist. We also added other controls we had already performed such as heat-inactivated apyrase, apyrase vehicle (PBS), and negative control (cells not loaded with caged-IP3). Controls are in the new Fig. 1, Fig. 3, Fig. 5, Suppl. Fig. 1, Suppl. Fig. 3.*

**2. Effect of ATP on T cell motility:**

*The authors conclude from Figures 6 and 7 that a release of ATP from activated T cells triggers an increase in Ca in the neighboring cells, which is responsible for reducing T cell motility. However, this conclusion is not supported by the data and additional control experiments are needed to assess this finding. Indeed, a close examination of Figure 6A and B shows that the*

*motility of control WT T cells within lymph node slices, in the absence of antigen, is unusually low (3-4  $\mu\text{m}/\text{min}$  in average compared to 10-15  $\mu\text{m}/\text{min}$  in the majority of studies even the one performed with LN slices). This near static displacement is comparable to that of OT2 T cells interacting with ova-pulsed dendritic cells. This is a concern as it is unknown whether the same paracrine effect would be still observed when T cells move with a normal speed. One possible reason for such a low motility is that the recording has been made near the cut surface of the slice, in regions in which T cells hardly migrate. The authors must repeat these experiments and make sure images are captured 20-30  $\mu\text{m}$  below the surface of the slice.*

Different cells may exhibit different migration speeds. For example, in a recent paper (PNAS 2013; 110(12): 4458–4463), OT-II cells migrated at mean velocity of  $5.4 \pm 0.27 \mu\text{m}/\text{min}$  whereas polyclonal cells had a mean velocity of  $8.9 \pm 0.15 \mu\text{m}/\text{min}$ . We also observed different velocities, although in our case WT cells were slower than OT-II cells. Another study (JEM 2006; 203 (3):505-511) has also reported different migration velocities in antigen specific T and WT cells (Tg-MBP  $6.34 \mu\text{m}/\text{min}$  and bystander WT T  $5.51 \mu\text{m}/\text{min}$ ). Unfortunately we do not know the WT T migration in unimmunized LN in this paper. However, even in this study, the WT T velocity reported is lower than the general velocity reported in other intravital studies, and we suspect that bystander cells are susceptible to complex environmental signals in the LNs that may depend on different experimental conditions.

This may depend on the dyes used as well on the different system (intravital vs LN slices) or the different cell preparation, but the fact that two cell populations display different mean velocities in the same LN is not surprising and already documented. We have also performed the same experiment using two different TCR transgenic T cells, specific for different antigens (Hemagglutinin (HA-TCR) and Leishmania major LACK antigen (LACK-TCR) and found the same results. In this case, they had very similar velocities (TCR-HA  $7.27 \pm 0.55 \mu\text{m}/\text{min}$ , TCR-LACK  $8.42 \pm 0.53 \mu\text{m}/\text{min}$ ) in the absence of peptides. In the presence of LACK-loaded DCs, the velocity of HA-TCR T cells was  $4.56 \pm 0.26 \mu\text{m}/\text{min}$ . However, we agree with the referee when he/she says that WT cells were slow in our previous experiments.

We repeated the 2P imaging experiment and made sure all the z-stacks were acquired at least 20 $\mu\text{m}$  under the surface of the LN slice. We improved the overall protocol starting with cell labeling, adjusted the overlaying time to increase cell penetrance into the slices, and interchanged the dyes between WT and OT2 T cells. Some discrepancies did remain between the two T cells but the overall velocities have improved in the new experiments (OT-II T  $5.88 \pm 0.25 \mu\text{m}/\text{min}$ , WT T  $4.37 \pm 0.09 \mu\text{m}/\text{min}$ ; new Figure 6). Considering that with different transgenic T cells (HA-T and LACK-T cells) we detected higher velocities (T-HA  $7.27 \pm 0.55 \mu\text{m}/\text{min}$ , T-LACK  $8.42 \pm 0.53 \mu\text{m}/\text{min}$ ) in the same experimental setting used in this paper, we conclude that the slower migration of WT T cells is not due to technical problems but is a property of  $\text{CD4}^+$  T cells obtained from C57BL/6J (H-2<sup>b</sup>) mice.

*To demonstrate a role of Ca in ATP-induced T cell stopping, the authors performed in vitro experiments in which T cell are bathed in a Ca-free solution and stimulated or not with ATP. Fig 5E shows that in the absence of Ca, ATP does not affect T cell motility. However, the absence of external Ca, by itself, has a major impact (a 3 fold reduction) on T cell migration triggered by SDF1. In these conditions, the authors cannot conclude that ATP mediates its effect through Ca*

*elevation. Experiments should be repeated using BAPTA, an intracellular Ca chelator.*

We thank the referee for this comment. We had already done these experiments and are happy to include them (Suppl. Figure 4). The reason why we didn't include them in the first version of the manuscript is that BAPTA (and its vehicle DMSO) reduced the velocity of migration. We have now included an additional control using P2X receptor antagonist suramin (Figure 5 and Suppl. Figure 3) and showing that suramin prevents the ATP-induced decrease in T cell motility.

*Other concerns that should be addressed: Caged compounds offer a number of advantages. Yet, several sources of errors has also been described with these reagents including an effect of the flash itself as well as the release of a number of biologically active molecules upon the photolysis of caged compounds. Thus, a control experiment is required to make sure that the flash does not trigger a response in the absence of caged IP3. Fig 1F shows a flat Ca curve for bystander T cells treated with apyrase. This is not consistent with Fig 1C and image B that show rare T cells increasing their Ca upon apyrase treatment. Does the Fig 1F display the Ca concentration of a single cell or does it represent the mean of multiple cells? In such a case, how many cells have been analyzed?*

We apologize for having not mentioned the control experiments that we had performed at the beginning of our study. They include cells that do not contain caged-IP3 (Suppl. Figure 1).

As for the second part of the comment, the majority of the bystander cells only oscillated once within the imaging time frame (one peak). Fig1F shows the mean of 20+ cells. The cells that were nearest to the uncaged cell began to oscillate first, for which the mean demonstrated a small increase in calcium ratio. As the time went on, more cells began to oscillate, which further increased the ratio, thus creating the effect of multiple oscillations of the graph. We have included calcium response of the individual cells as Supplementary Figure 1.

*Fig 2: In lymph node slices, the Ca wave spreads extremely rapidly within the first 20 seconds following the uncaging of IP3 in the first cells. By comparison, the spreading effect is much slower on cultured cells. The authors should comment on the possible reasons of such a difference.*

Several reasons may explain the difference. i) In LNs the cells are tightly packed and ATP doesn't need to diffuse as in experiments shown in Fig.1. ii) In LNs there are several types of cells that may differently contribute to the propagation of the waves. Indeed, the response depends on the expression of P2X7 and P2X4 receptors, which is different even among T cells (naïve vs memory), as well as on the ATP content and the properties of the calcium responses.

*Fig 3 C and D and 4B: The authors state on many occasions that T cells, either bystander or stimulated with ATP, exhibit Ca oscillations. However, only average Ca responses are shown. Are the ATP-induced Ca responses indeed oscillating? The authors should show traces corresponding to typical single cell Ca responses, elicited in bystander cells after single cell stimulations, or after bath-applied ATP. In addition, the ordinate in Fig 4B is not correct. Indeed, Flow cytometry does*

*not permit to measure Ca oscillations. Instead of "% of cells oscillated", one should read "% of ATP-responding T cells"*

The referee is absolutely right because we used the term oscillation improperly. ATP induced usually only one calcium influx during the time-lapse acquisition. We have modified the text. Calcium response of single cells, of either bystander cells or bath-applied, is now shown in supplementary Figure 1F. We have modified the figure legend in Fig 4 accordingly.

*The videos 6 and 7 show the dynamic behavior of only one or two T cells surrounding a T-DC conjugate. With this low number of T cells, you cannot really judge on the motility of T cells close to or more distant from a T-DC conjugate. Can the authors provide some movies showing the raw data (max projection or best focus and not 3D reconstructions) of T-DC conjugates surrounded by multiple T cells.*

We have performed new experiments and are now presenting new movies with raw data projection of T-DC conjugates. These are supplementary videos 6 – 8.

*The present study suffers from lack of details and information. - Fig 1C: what are the criteria to determine if a T cell has increased its Ca or not? - Figure 5 B-E: values should be given in  $\mu\text{m}$  and not in pixels. - In Fig 3 and 5, experiments are performed in the absence of Ca. What does "absence of Ca" mean? Ca buffered with a chelator (which final Ca concentration?) or no Ca added (which means a few tens of  $\mu\text{M}$  in reality)?*

The cut off line was the increase in calcium ratio of more than 1.5 (basal calcium level is 1). Fig 5 values are now in  $\mu\text{m}$ . Absence of Ca meant that it was a PBS that manufacturer claimed to be calcium free. We purchased ready-to-use PBS from Lonza.



### Referee #3

We thank the referee for his/her comments and suggestions. We have tried to address all of them and modify the manuscript accordingly.

*In this manuscript, Drs. Wang et al described that ATP release serves as a novel cell- to-cell communication mechanism. Specifically, they reported that ATP released by stimulated T cells induces P2X4/P2X7-mediated calcium waves in the neighboring lymphocytes. Using lymph node slices, they found evidence that ATP acts as a paracrine messenger that reduces the motility of lymphocytes during T cell priming. They conclude that this mechanism may be necessary for antigen scanning by T cells.*

*Comments: The title could be more precise.*

Although we like the title, in the first page of the manuscript we have proposed another one and we are open to suggestion from the referee and/or editors.

*The finding that ATP causes calcium waves in T cell preparations is not entirely new and was reported about a decade ago by Cahalan's group. This work should be cited.*

We are not aware of this paper, although we have carefully looked in the literature. Cahalan's group has described calcium oscillation in mast cells, a paper that we have already cited in the manuscript (Osipchuk and Cahalan 1992). In 1997, they analysed the type of calcium responses induced by extracellular ATP (added directly to the culture medium) at the single-cell level in thymocytes (Ross et al., JCB 1997). In this study, the group describes how a single cell responds to ATP in terms of calcium influx ("[Ca<sup>2+</sup>]<sub>i</sub> rose slowly at first to a mean value of 260 nM after 163 s and then increased rapidly to a peak level of 735 nM.... The rank order of potency for adenine nucleotides was BzATP<sub>42</sub>.ATP<sub>42</sub>.MgATP<sub>22</sub>.ADP<sub>32</sub>, suggesting purinoreceptors of the P2X7/P2Z class mediate the ATP<sub>o</sub> response.") but does not analyse the paracrine regulation of calcium waves in T lymphocytes. We would be grateful to the referee if he/she could indicate the reference of the mentioned study.

*Induction of Ca<sup>2+</sup> signaling by using caged IP3 does not necessarily replicate the complex processes induced via TCR/CD28 stimulation. Please comment on rationale and compare ATP release using this and other T cell stimulation methods, e.g., with microbeads carrying CD3/Cd28 ABs.*

The reason why we used caged-IP3 to induce ATP release in a single cell is that all other methods would have stimulated many cells at the same time, thus making impossible the distinction between autocrine and paracrine effects of the molecule.

We have measured the amount of ATP released upon IP3 uncaging and anti-CD3/anti-CD28 stimulation (Supplementary Figure 2).

*The amount of ATP released by a single cell might not be high enough to trigger P2X receptors in*

*bystander cells (especially after diffusion of the released ATP). It would be necessary to demonstrate that exogenous ATP induces similar responses as those shown in Fig. 1.*

We demonstrated that extracellular ATP induces calcium signalling in T cells and that this is mediated by P2X7 and P2X4 receptors (Fig. 4). We have also shown that extracellular ATP reduces T cell motility in a calcium-dependent manner (Fig. 5). Of course, it would be impossible to identify calcium waves using extracellular ATP because all cells do see ATP at the same time.

The new Figure 3 includes experiments with the P2X antagonist suramin: by blocking P2X receptors we block calcium signaling in bystander cells, indicating that the amount of ATP released by a single cell is indeed enough to activate P2X receptors in the bystander ones.

*The amount of ATP released should be quantified.*

The absolute amount of ATP released by  $10^6$  T cells was  $0.87 \pm 0.40$  ng during resting condition, and this increases to  $1.63 \pm 0.58$  ng when stimulated with UV photolysis of caged  $-IP_3$ , and  $1.55 \pm 0.32$  ng when stimulated with anti-CD3/anti-CD28 antibodies. In nM terms, it means that when stimulated by  $IP_3$  uncaging T cells released  $12.15 \pm 3.57$  nM, in the bulk supernatant (the local ATP concentrations near the cell surface of the cells that release ATP can be considerably higher than in the bulk solution). These data are in agreement with published results (PNAS 2007, 105: 8067).

The new data comparing the level of ATP released in response of the two stimuli is now included as Supplementary Figure 2.

*Figure 1: negative controls should be added and evidence or absence of spontaneous  $Ca^{2+}$  fluxing should be shown. Please also state how many cells per image frame were assessed (n seems quite low). The difference between control and apyrase treatment does not seem very impressive when one compares the data shown in Fig. 1A and 1B.*

We have included the experimental controls for apyrase, such as heat-inactivated apyrase, and the negative control (cells not loaded with caged- $IP_3$ ). These data and the respective N numbers are shown as the new Figure 1 and Supplementary Figure 1. The difference in the pictures of Fig1A and 1B may not appear impressive to the eye but the more subjective quantification shown in Fig 1C clearly indicated a significant inhibition of bystander calcium wave by apyrase. Moreover, we have included the single traces in the new Supplementary Fig. 1. Here, the difference is quite clear.

*Figure 2: It would be interesting to know what could cause the termination of the  $Ca^{2+}$  waves. This is an important question since bystander cells may also release ATP.*

We agree that this could be another interesting question, but it would require several months of additional work. We have discussed about this question with two experts in the field of ATP and Calcium signalling, Fabio Mammano and Tullio Pozzan. In all tissues where ATP-induced calcium waves were analysed there is a spontaneous termination that is believed to depend on

the action of ectonucleotidases combined with the different ability of different cells to release ATP. However, a specific mechanism has not been conclusively described.

*Fig. 3: Did you perform the experiment in the absence of caged drugs? Could it be that UV excitation induces ATP?*

Yes, we did perform these controls and UV excitation does not induce any type of detectable response. We have included this control in Supplementary Figure 1.

*Figure 4: Panel A - why are data for other P2XRs not shown? In panels B & D, please indicate how many cells were analyzed? In panel E, it would be interesting to see the calcium response to TCR/CD28 stimulation for comparison reasons.*

P2X2 and P2X3 are not expressed in lymphocytes. The data comparing the calcium responses to ATP or anti-CD3/anti-CD28 is shown in Supplementary Figure 2B.

*Data in Figure 4, panel G should also be shown using imaging as was so nicely done in Fig. 1. Was it possible to detect ATP-induced Ca<sup>2+</sup> influx also via microscopy and at what concentrations?*

Transfected primary T cells are generally less fit and not optimal for microscopy experiments because it is difficult to exclude dead or dying cells from the analysis. We opted for the FACS approach in order to examine large numbers of viable cells (by performing a specific gate that excludes dead/dying cells). Moreover, the transfection doesn't occur in 100% of cells, and thus it is more correct to examine large numbers of cells in these experiments.

*In Figure 5, could a similar experiment be done with Fluo-4 loaded cells to image possible Ca<sup>2+</sup> waves in migrating cells? Which effect did apyrase or P2X4 and P2X7 antagonists have on migration? Please could you show velocity results in um/min rather than pixels/min?*

In these experiments, we added extracellular ATP to analyse its effect on migration. Thus, it would be impossible to detect calcium-waves because all cells do see ATP at the same time. Using apyrase together with extracellular ATP would simply result in a "control" condition. However, we have included new data using the P2X antagonist suramin (New Figure 5 and Supplementary Fig. 3)

*Figure 6: How could one explain that WT but not OT-II T cells were affected by apyrase?*

OT-II cells slow down their velocity because they engage in stable interactions with OVA-pulsed DCs. During these interactions, they get triggered and secrete ATP, which slows down WT T cells. When apyrase is added, OT-II cells are still in contact with OVA-DCs (there is no reason why apyrase should break T-DCs conjugates) and thus they remain poorly motile, whereas WT T cells recover their motility.

Thank you for submitting your revised manuscript to The EMBO Journal. Your analysis has now been seen by referee #2 and 3 and their comments are provided below.

As you can see below, both referees appreciate the introduced changes and support publication here. They raise a few minor issues that shouldn't involve too much additional work to address. You can use the link below to upload the revised version. If you have any questions just contact me.

## REFEREE REPORTS

-----

### Referee #2:

As stated in my initial review, this manuscript describes the new and potentially important finding concerning ATP-dependent communication between T cells, addressed in cultured cells and in a more physiological setting of lymph node slices. This revised study responds adequately to most of my earlier concerns and is overall much improved. In particular, the authors have performed several new experiments requested in my initial review. These include the use of suramin, as another inhibitor of ATP signaling. The initial study suffered from a lack of controls but this has been fixed.

A concern that remains, however, is the motility analysis derived from 2 photon imaging experiments. The authors provide, in their revised work, some new movies that are improved as compared to the previous ones. Yet, they are still difficult to read and the differences noted by the authors are really not obvious. One way to help convey the different migratory behavior of T cells in different conditions would be to superimpose to these animations the trajectories of each individual cell. The authors mentioned, in the legend of video 7 that such tracks are present but it does not seem to be the case. In addition, the authors should provide another movie 7. In the current movie, there is a rightward movement of several T cells, likely due to artefactual drift created by the flow of the perfusion.

The explanations provided by the authors regarding the overall low T cell motility reported in this study, a point also raised by referee 1 and exanplified in Movie 8 in which most of the OT2 cells are stationnary, are OK. Even it is not the strongest and most convincing part of the study, one can give credit to the authors for having realized such experiments.

### Referee #3:

The authors made the suggested changes, thus greatly improving this MS. The title is much more precise and interesting for the potential readers. However, several relatively minor issues still require attention.

#### Minor issues:

Describe in legends what types of cells were studied in the different figures.

The description of the y-axis in Fig. 1C is imprecise (laboratory specific jargon?) and should be changed. Also in the text, terms like "flux calcium" should be replaced.

The name labels of drug 5-BDBD in Figs. is inconsistent with text.

Stretching scales in Figs. 4 E and G would help viewing differences.

Please provide sources and other product information about the reagents used, e.g., CXCL12.

Referee #2:

*As stated in my initial review, this manuscript describes the new and potentially important finding concerning ATP-dependent communication between T cells, addressed in cultured cells and in a more physiological setting of lymph node slices. This revised study responds adequately to most of my earlier concerns and is overall much improved. In particular, the authors have performed several new experiments requested in my initial review. These include the use of suramin, as another inhibitor of ATP signaling. The initial study suffered from a lack of controls but this has been fixed.*

*A concern that remains, however, is the motility analysis derived from 2 photon imaging experiments. The authors provide, in their revised work, some new movies that are improved as compared to the previous ones. Yet, they are still difficult to read and the differences noted by the authors are really not obvious. One way to help convey the different migratory behavior of T cells in different conditions would be to superimpose to these animations the trajectories of each individual cell. The authors mentioned, in the legend of video 7 that such tracks are present but it does not seem to be the case. In addition, the authors should provide another movie 7. In the current movie, there is a rightward movement of several T cells, likely due to artefactual drift created by the flow of the perfusion.*

*The explanations provided by the authors regarding the overall low T cell motility reported in this study, a point also raised by referee 1 and exanplified in Movie 8 in which most of the OT2 cells are stationnary, are OK. Even it is not the strongest and most convincing part of the study, one can give credit to the authors for having realized such experiments.*

We have now superimposed migration tracks of wildtype T cells in supplementary videos 6 – 8 as suggested by the referee. Any drift is carefully corrected within the IMARIS analysis software. The supplementary material and video legends are amended accordingly to include trajectory information.

Referee #3:

*The authors made the suggested changes, thus greatly improving this MS. The title is much more precise and interesting for the potential readers. However, several relatively minor issues still require attention.*

We will use the new title as suggested by the referee.

*Minor issues:*

*Describe in legends what types of cells were studied in the different figures.*

We have now included information on the type of cells studied in each of the figure legends

*The description of the y-axis in Fig. 1C is imprecise (laboratory specific jargon?) and should be changed. Also in the text, terms like "flux calcium" should be replaced.*

We have replaced the y-axis title to “% of ATP-responding cells”. In the text, “calcium response” or “calcium influx” used as replacement where appropriate.

*The name labels of drug 5-BDBD in Figs. is inconsistent with text.*

The labelling in Fig4 is now consistent with the text.

*Stretching scales in Figs. 4 E and G would help viewing differences.*

We have stretched the y-axis scales in Fig4 E and G.

*Please provide sources and other product information about the reagents used, e.g., CXCL12.*

We have included more information about product sources for CXCL12, CellTracker Blue CMAC and antibodies.
